# Supplementary material for: Development of a microfluidic membraneless vaporization flow system for trace analysis of arsenic
Source: Royal Society of Chemistry journal article supplement (doi:10.1039/d0ay01970d), 2020-12-08
Supplement: d0ay01970d1.pdf [file d0ay01970d1.pdf]

## Supporting information for the MS entitled

### ‘Development of membraneless vaporization device coupled with a flow system for trace analysis of arsenic’

Nuanlaor Ratanawimarnwong,<sup>\*a,b</sup> Patcharat Ruckchang,<sup>a</sup> Supattra Yooram,<sup>a</sup> Kriangsak Songsrirote,<sup>a</sup> Kanchana Uraisin,<sup>b,c</sup> and Victor Cerdà<sup>d</sup>

---

<sup>a.</sup> *Department of Chemistry, Faculty of Science, Srinakharinwirot University, Sukhumvit 23, Bangkok 10110 Thailand.*

<sup>b.</sup> *Flow Innovation-Research for Science and Technology Laboratories (Firstlabs), Thailand.*

<sup>c.</sup> *Department of Chemistry and Center of the Excellence for Innovation in Chemistry, Faculty of Science, Mahidol University, Bangkok 10400, Thailand*

<sup>d.</sup> *Department of Chemistry, University of the Balearic Islands, 07122 Palma de Mallorca, Spain.*

\*Corresponding author’s email: [nuanlaor@g.swu.ac.th](mailto:nuanlaor@g.swu.ac.th)

#### Supplementary materials

**Table S1** Program for SIA operation

**Figure S2** Schematic of the “jam jar” gas diffusion apparatus.

**Figure S3** Design made with the program Rhinoceros to create the \*.stl file used by the FormLabs 3D printer. A) upper view, B) Perspective, C) Lateral view, and D) Frontal view.

**Figure S4** Calibration curves obtained from standard As(III) or As(V) (with prior reduction step) using the MVP-flow analysis method.

**Table S1** Program for SIA operation

|                                                                                                                                                                                                                                                                                                                                                                                                                                                                                                                                                                                                                                                                                                                                                                                                                                                                                                                                                                                                                                                                                                                                                                                                                                                                                                                                                                                                            |                                                                                                                                                                                                                                                                                                                                                                                                                                                                                                                                                                                                                                                                                                                                                                                                                                                                                                                                                                                                                                                                                                                                                                                            |
|------------------------------------------------------------------------------------------------------------------------------------------------------------------------------------------------------------------------------------------------------------------------------------------------------------------------------------------------------------------------------------------------------------------------------------------------------------------------------------------------------------------------------------------------------------------------------------------------------------------------------------------------------------------------------------------------------------------------------------------------------------------------------------------------------------------------------------------------------------------------------------------------------------------------------------------------------------------------------------------------------------------------------------------------------------------------------------------------------------------------------------------------------------------------------------------------------------------------------------------------------------------------------------------------------------------------------------------------------------------------------------------------------------|--------------------------------------------------------------------------------------------------------------------------------------------------------------------------------------------------------------------------------------------------------------------------------------------------------------------------------------------------------------------------------------------------------------------------------------------------------------------------------------------------------------------------------------------------------------------------------------------------------------------------------------------------------------------------------------------------------------------------------------------------------------------------------------------------------------------------------------------------------------------------------------------------------------------------------------------------------------------------------------------------------------------------------------------------------------------------------------------------------------------------------------------------------------------------------------------|
| <p>'fill water'</p> <p>S1.SYRINGE_VALVE "IN"</p> <p>S1.ASPIRATE: <b>1000</b> uL   Speed: <b>100</b> uL/s</p> <p>DELAY <b>1</b> s</p> <p>S1.SYRINGE_VALVE "OUT"</p> <p>'donor 1'</p> <p>V1.VALVE PORT: <b>1</b></p> <p>DELAY <b>2</b> s</p> <p>S1.ASPIRATE: <b>1300</b> uL   Speed: <b>100</b> uL/s</p> <p>DELAY <b>3</b> s</p> <p>V1.VALVE PORT: <b>5</b></p> <p>DELAY <b>2</b> s</p> <p>S1.ASPIRATE: <b>50</b> uL   Speed: <b>30</b> uL/s</p> <p>DELAY <b>3</b> s</p> <p>V1.VALVE PORT: <b>7</b></p> <p>DELAY <b>2</b> s</p> <p>S1.ASPIRATE: <b>225</b> uL   Speed: <b>30</b> uL/s</p> <p>DELAY <b>3</b> s</p> <p>V1.VALVE PORT: <b>6</b></p> <p>DELAY <b>2</b> s</p> <p>S1.ASPIRATE: <b>200</b> uL   Speed: <b>30</b> uL/s</p> <p>DELAY <b>3</b> s</p> <p>V1.VALVE PORT: <b>7</b></p> <p>DELAY <b>2</b> s</p> <p>S1.ASPIRATE: <b>225</b> uL   Speed: <b>30</b> uL/s</p> <p>DELAY <b>3</b> s</p> <p>ALARM</p> <p>DELAY <b>5</b> s</p> <p>V1.VALVE PORT: <b>6</b></p> <p>DELAY <b>2</b> s</p> <p>S1.ASPIRATE: <b>200</b> uL   Speed: <b>30</b> uL/s</p> <p>DELAY <b>3</b> s</p> <p>V1.VALVE PORT: <b>5</b></p> <p>DELAY <b>2</b> s</p> <p>S1.ASPIRATE: <b>50</b> uL   Speed: <b>30</b> uL/s</p> <p>DELAY <b>3</b> s</p> <p>V1.VALVE PORT: <b>3</b></p> <p>DELAY <b>2</b> s</p> <p>S1.DISPENSE: <b>2250</b> uL   Speed: <b>30</b> uL/s</p> <p>DELAY <b>120</b> s</p> <p>ALARM</p> <p>'suction of donor'</p> | <p>DELAY <b>25</b> s</p> <p>'washing donor 1'</p> <p>V1.VALVE PORT: <b>1</b></p> <p>DELAY <b>2</b> s</p> <p>S1.ASPIRATE: <b>1000</b> uL   Speed: <b>100</b> uL/s</p> <p>DELAY <b>3</b> s</p> <p>V1.VALVE PORT: <b>4</b></p> <p>DELAY <b>2</b> s</p> <p>S1.ASPIRATE: <b>1000</b> uL   Speed: <b>50</b> uL/s</p> <p>DELAY <b>3</b> s</p> <p>ALARM</p> <p>V1.VALVE PORT: <b>3</b></p> <p>DELAY <b>2</b> s</p> <p>S1.DISPENSE: <b>2000</b> uL   Speed: <b>50</b> uL/s</p> <p>DELAY <b>3</b> s</p> <p>ALARM</p> <p>DELAY <b>20</b> s</p> <p>'washing donor 2'</p> <p>V1.VALVE PORT: <b>1</b></p> <p>DELAY <b>2</b> s</p> <p>S1.ASPIRATE: <b>1000</b> uL   Speed: <b>100</b> uL/s</p> <p>DELAY <b>3</b> s</p> <p>V1.VALVE PORT: <b>4</b></p> <p>DELAY <b>2</b> s</p> <p>S1.ASPIRATE: <b>1000</b> uL   Speed: <b>50</b> uL/s</p> <p>DELAY <b>3</b> s</p> <p>ALARM</p> <p>V1.VALVE PORT: <b>3</b></p> <p>DELAY <b>2</b> s</p> <p>S1.DISPENSE: <b>2000</b> uL   Speed: <b>50</b> uL/s</p> <p>DELAY <b>3</b> s</p> <p>ALARM</p> <p>DELAY <b>40</b> s</p> <p>V1.VALVE PORT: <b>8</b></p> <p>S1.POSITION: <b>000</b> uL   Speed: <b>100</b> uL/s</p> <p>ALARM</p> <p>DELAY <b>1</b> s</p> <p>ALARM</p> |
|------------------------------------------------------------------------------------------------------------------------------------------------------------------------------------------------------------------------------------------------------------------------------------------------------------------------------------------------------------------------------------------------------------------------------------------------------------------------------------------------------------------------------------------------------------------------------------------------------------------------------------------------------------------------------------------------------------------------------------------------------------------------------------------------------------------------------------------------------------------------------------------------------------------------------------------------------------------------------------------------------------------------------------------------------------------------------------------------------------------------------------------------------------------------------------------------------------------------------------------------------------------------------------------------------------------------------------------------------------------------------------------------------------|--------------------------------------------------------------------------------------------------------------------------------------------------------------------------------------------------------------------------------------------------------------------------------------------------------------------------------------------------------------------------------------------------------------------------------------------------------------------------------------------------------------------------------------------------------------------------------------------------------------------------------------------------------------------------------------------------------------------------------------------------------------------------------------------------------------------------------------------------------------------------------------------------------------------------------------------------------------------------------------------------------------------------------------------------------------------------------------------------------------------------------------------------------------------------------------------|

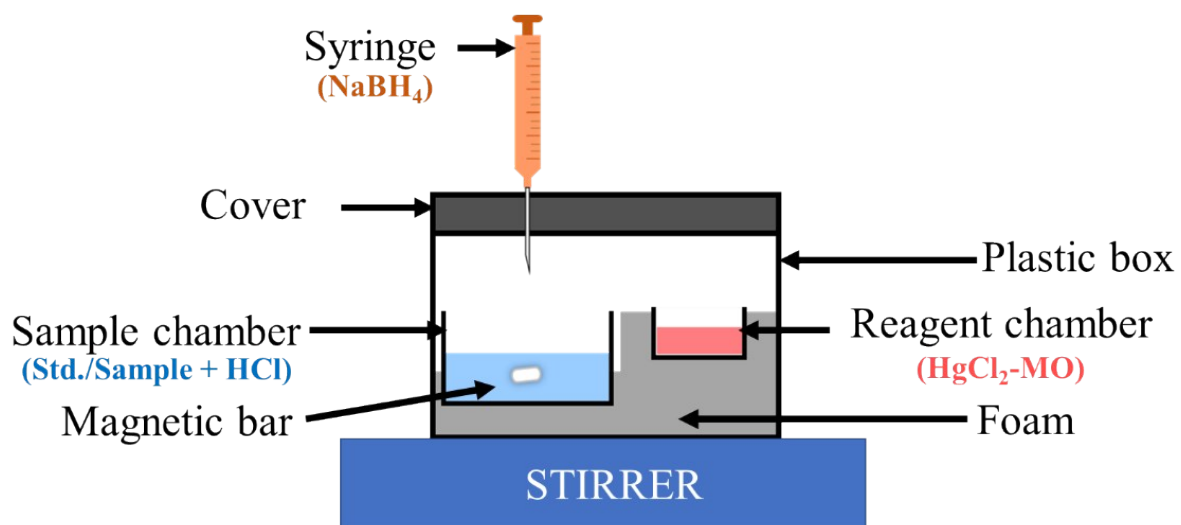

Figure S2. Schematic of the “jam jar” gas diffusion apparatus.

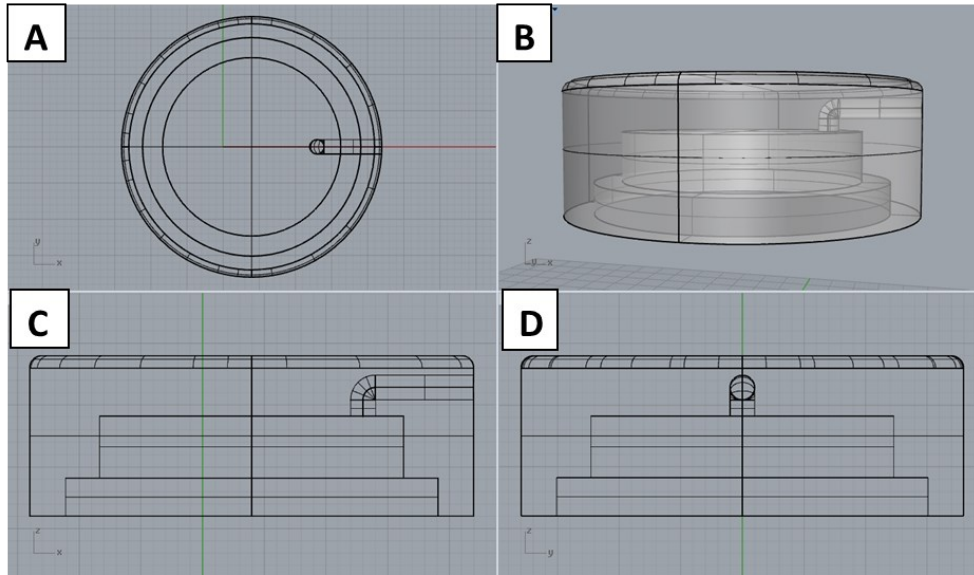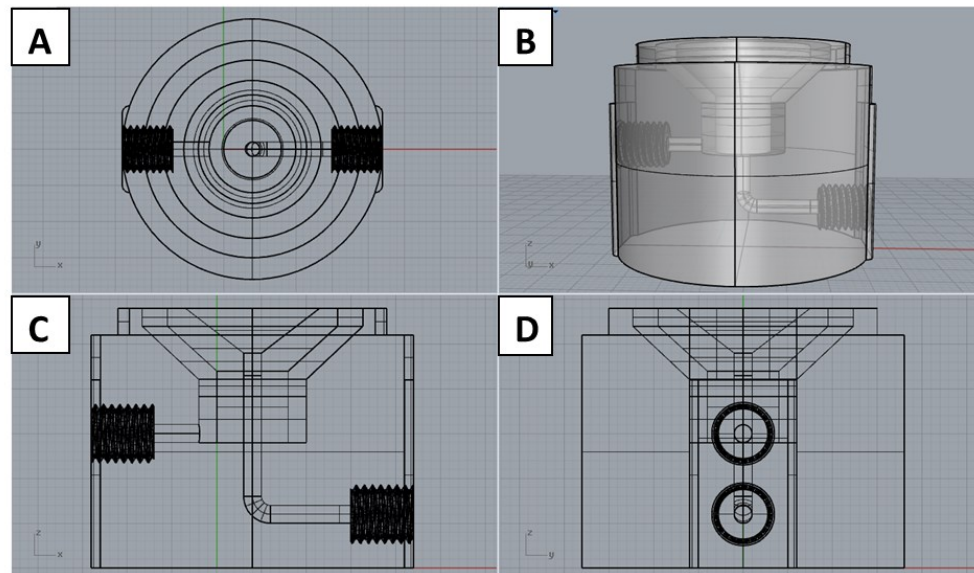

**Figure S3** Design made with the program Rhinoceros to create the \*.stl file used by the FormLabs 3D printer. A) Upper view, B) Perspective, C) Lateral view, and D) Frontal view

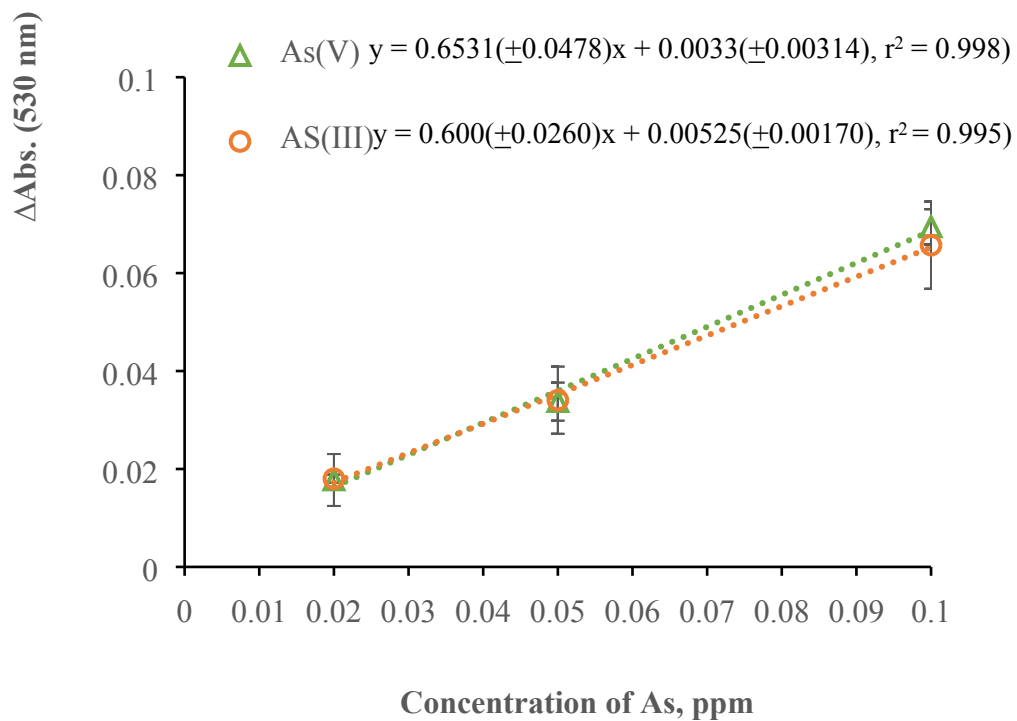

**Figure S4** Calibration curves obtained from standard As(III) or As(V) (with prior reduction step) using the MVP-flow analysis method.
